# Supplementary material for: Compound K Attenuates the Development of Atherosclerosis in ApoE−/− Mice via LXRα Activation
Source: MDPI journal article supplement (doi:10.3390/ijms17071054), 2016-07-08
Supplement: s1 [file s1]

# Supplementary Materials: Compound K Attenuates the Development of Atherosclerosis in ApoE<sup>-/-</sup> Mice via LXR $\alpha$ Activation

Li Zhou, Yu Zheng, Zhuoying Li, Lingxia Bao, Yin Dou, Yuan Tang, Jianxiang Zhang, Jianzhi Zhou, Ya Liu, Yi Jia and Xiaohui Li

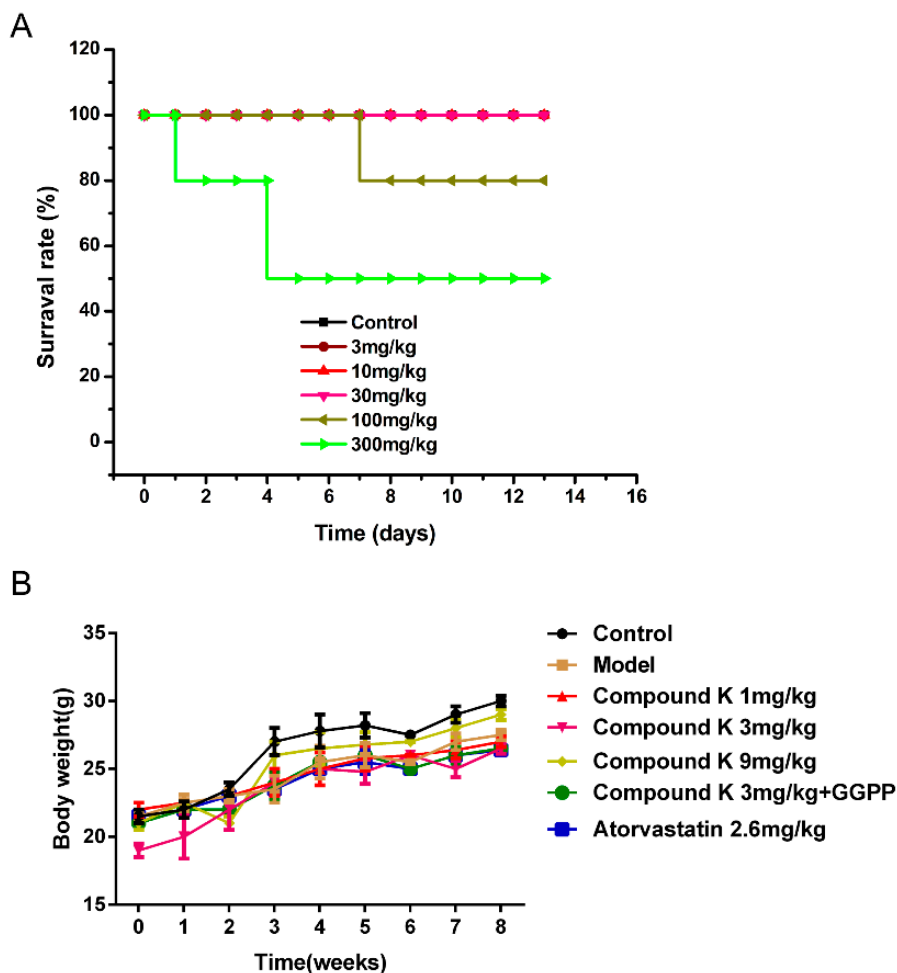

**Figure S1.** Potential acute toxicity of Compound K in vivo. Compound K of different concentration was administered to mice i.p. once. Survival ratio was recorded after 14 days. There was no mouse got dead until the compound K dose reached 100 mg/kg (A); During the in vivo experiments, animals were weighed every week. There was no significant alteration in the body weight (B). Data of weight are presented as mean  $\pm$  SEM ( $n = 6$ ), and analysed by ANOVA with Dunnett's post-hoc analysis.

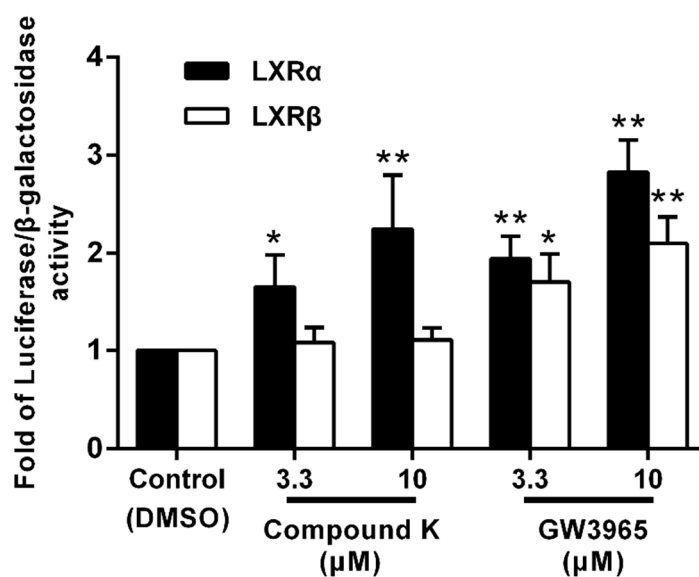

**Figure S2.** Compound K selectively activates LXR- $\alpha$  in HEK293T cell line. The HEK293T cells were transfected with hLXREx3TK-Luc as a reporter plasmid, pCMX-hLXR- $\alpha$  or pCMV-hLXR- $\beta$  as expression vectors, and pSV- $\beta$ -galactosidase was used to normalise the transfection efficiencies. Cells were treated with increasing concentrations of compound K (3.3, 10  $\mu$ M). GW3965 (3.3, 10  $\mu$ M) was used as positive control. After incubation, the cells were lysed, and assayed for luciferase and  $\beta$ -galactosidase activities. The results are expressed as relative luciferase activity (fold difference compared to negative control). Data are presented as mean  $\pm$  SEM ( $n = 3$ , each in duplicate). \*  $p < 0.05$  vs. control, \*\*  $p < 0.01$  vs. control.
